# Supplementary material for: Influenza Vaccination and Mortality: Differentiating Vaccine Effects From Bias
Source: PubMed Central journal article supplement — Am J Epidemiol. 2009 Jul 22;170(5):650–6. doi: 10.1093/aje/kwp173 (PMC2728831; doi:10.1093/aje/kwp173), 2009-07-22
Supplement: kwp173_1.pdf [file kwp173_1.pdf]

## WEB APPENDIX

Case-centered logistic regression can be a useful way to fit multiplicative intensity models (see reference A1), including stratified Cox models, with familiar software. In this 3-part appendix, we show its relation to stratified Cox regression.

Part 1 shows that it maximizes the same likelihood as stratified Cox regression.

Part 2 shows that it yields the same parameter estimates, and they have the same interpretation.

Part 3 illustrates how it is done in SAS. Several models are fitted to simulated data.

### Part 1 – Equivalence of likelihood functions

Given a particular calendar day  $t$ , define the following:

$$R(t) = \begin{cases} 1 & \text{if patient was at risk of death on day } t \\ 0 & \text{if patient had died before day } t \end{cases}$$

$$D(t) = \begin{cases} 1 & \text{if patient died on day } t \\ 0 & \text{if patient did not die on day } t \end{cases}$$

$$E(t) = \begin{cases} 1 & \text{if patient had been vaccinated before day } t \\ 0 & \text{if patient had not been vaccinated before day } t \end{cases}$$

Let  $X$  be a discrete covariate that is to be adjusted for in this analysis. We are interested in the impact of  $E(t)$  on  $D(t)$ , within strata defined by  $X$ . A stratified Cox regression would then model the hazard of death as

$$P(D(t) = 1 | E(t) = e, X = x, R(t) = 1) = \lambda_{0,x}(t) e^{\alpha_0 e + \alpha_1 e x}, \quad (1)$$

where  $\lambda_{0,x}(t)$  is an unspecified baseline hazard among subjects with  $X = x$ . The relative hazard associated with vaccination for a subject with  $X = x$  is given by

$$RH(t | X = x) = \frac{P(D(t) = 1 | E(t) = 1, X = x, R(t) = 1)}{P(D(t) = 1 | E(t) = 0, X = x, R(t) = 1)} = e^{\alpha_0 + \alpha_1 x}.$$

The case-centered analysis fits a logistic regression

$$\log \frac{P(E(t) = 1 | D(t) = 1, X = x, R(t) = 1)}{1 - P(E(t) = 1 | D(t) = 1, X = x, R(t) = 1)} = \log \frac{P(E(t) = 1 | X = x, R(t) = 1)}{1 - P(E(t) = 1 | X = x, R(t) = 1)} + \beta_0 + \beta_1 x \quad (2)$$

to a data set containing only decedents that models the log odds of vaccination among patients who died at  $t$  and had a covariate value  $X = x$  as a function of  $x$  and an offset that gives the log odds of vaccination among all patients with  $X = X$  who were at risk of death at  $t$ .

Let  $t_1 < t_2 < \dots < t_K$  denote the  $K$  distinct, ordered event times. Let  $e_{l,k}$  denote the vaccination status of patient  $l$  on day  $t_k$ . Let  $D_k$  denote the set of indices for the patients who died at  $t_k$ ; let  $R_{k,x}$  denote the set of indices for the patients with  $X = x$  who were at risk of dying at  $t_k$ . Let  $n_{k,e,x}$  denote the number of patients at risk of death at  $t = t_k$  with  $E = e$  and  $X = x$ . Then the Breslow partial likelihood function for the stratified Cox regression (model 1) is given by

$$L(\alpha_0) = \prod_{k=1}^K \prod_{l \in D_k} \frac{e^{\alpha_0 e_{l,k} + \alpha_1 e_{l,k} x_l}}{\sum_{m \in R_{k,x_l}} e^{\alpha_0 e_{m,k} + \alpha_1 e_{m,k} x_l}} \quad (3)$$

$$= \prod_{k=1}^K \prod_{l \in D_k} \frac{e^{\alpha_0 e_{l,k} + \alpha_1 e_{l,k} x_l}}{n_{k,0,x_l} + n_{k,1,x_l} e^{\alpha_0 + \alpha_1 x_l}} \quad (4)$$

Note that at time  $t_k$ , the offset term in the logistic regression (model 2) for decedents with  $X = x$  is given by  $\log(n_{k,1,x} / n_{k,0,x})$ . The likelihood function for this model is therefore given by

$$L(\beta_0) = \prod_{k=1}^K \prod_{l \in D_k} \left[ \frac{e^{\log(n_{k,1,x_l} / n_{k,0,x_l}) + \beta_0 + \beta_1 x_l}}{1 + e^{\log(n_{k,1,x_l} / n_{k,0,x_l}) + \beta_0 + \beta_1 x_l}} \right]^{e_{l,k}} \times \left[ \frac{1}{1 + e^{\log(n_{k,1,x_l} / n_{k,0,x_l}) + \beta_0 + \beta_1 x_l}} \right]^{1-e_{l,k}} \quad (5)$$

$$= \prod_{k=1}^K \prod_{l \in D_k} \left[ \frac{n_{k,1,x_l} / n_{k,0,x_l} e^{\beta_0 + \beta_1 x_l}}{1 + n_{k,1,x_l} / n_{k,0,x_l} e^{\beta_0 + \beta_1 x_l}} \right]^{e_{l,k}} \times \left[ \frac{1}{1 + n_{k,1,x_l} / n_{k,0,x_l} e^{\beta_0 + \beta_1 x_l}} \right]^{1-e_{l,k}} \quad (6)$$

$$= \prod_{k=1}^K \prod_{l \in D_k} \left[ \frac{n_{k,1,x_l} e^{\beta_0 + \beta_1 x_l}}{n_{k,0,x_l} + n_{k,1,x_l} e^{\beta_0 + \beta_1 x_l}} \right]^{e_{l,k}} \times \left[ \frac{n_{k,0,x_l}}{n_{k,0,x_l} + n_{k,1,x_l} e^{\beta_0 + \beta_1 x_l}} \right]^{1-e_{l,k}} \quad (7)$$

$$= \prod_{k=1}^K \prod_{l \in D_k} \frac{e^{\beta_0 + \beta_1 x_l e_{l,k}} n_{k,1,x_l}^{e_{l,k}} n_{k,0,x_l}^{1-e_{l,k}}}{n_{k,0,x_l} + n_{k,1,x_l} e^{\beta_0 + \beta_1 x_l}} \quad (8)$$

$$= \left[ \prod_{k=1}^K \prod_{l \in D_k} \frac{e^{\beta_0 e_{l,k} + \beta_1 e_{l,k} x_l}}{n_{k,0,x_l} + n_{k,1,x_l} e^{\beta_0 + \beta_1 x_l}} \right] \left[ \prod_{k=1}^K \prod_{l \in D_k} n_{k,1,x_l}^{e_{l,k}} n_{k,0,x_l}^{1-e_{l,k}} \right] \quad (9)$$

Note that the first factor in equation 9 is equivalent to equation 4 and that the second factor in equation 9 does not depend on  $(\beta_0, \beta_1)$ . The point estimate and inference obtained by maximum-likelihood estimation of  $(\beta_0, \beta_1)$  in model 2 are hence identical to those obtained by maximum-likelihood estimation of  $(\alpha_0, \alpha_1)$  in 1.

## Part 2 – Equivalence of coefficient interpretations

Another way to derive the interpretation of the coefficients  $\beta_0$  and  $\beta_1$  in model 2 is based on the following algebra:

$$\begin{aligned}
 e^{\beta_0 + \beta_1 x} &= \frac{\frac{P(E(t) = 1 | D(t) = 1, X = x, R(t) = 1)}{1 - P(E(t) = 1 | D(t) = 1, X = x, R(t) = 1)}}{\frac{P(E(t) = 1 | X = x, R(t) = 1)}{1 - P(E(t) = 1 | X = x, R(t) = 1)}} \\
 &= \frac{\frac{P(E(t) = 1 | D(t) = 1, X = x, R(t) = 1)}{P(E(t) = 0 | D(t) = 1, X = x, R(t) = 1)}}{\frac{P(E(t) = 1 | X = x, R(t) = 1)}{P(E(t) = 0 | X = x, R(t) = 1)}} \\
 &= \frac{P(E(t) = 1 | D(t) = 1, X = x, R(t) = 1)P(E(t) = 0 | X = x, R(t) = 1)}{P(E(t) = 0 | D(t) = 1, X = x, R(t) = 1)P(E(t) = 1 | X = x, R(t) = 1)} \\
 &= \frac{\frac{P(D(t) = 1 | E(t) = 1, X = x, R(t) = 1)P(E(t) = 1 | X = x, R(t) = 1)}{P(D(t) = 1 | X = x, R(t) = 1)} P(E(t) = 0 | X = x, R(t) = 1)}{\frac{P(D(t) = 1 | E(t) = 0, X = x, R(t) = 1)P(E(t) = 0 | X = x, R(t) = 1)}{P(D(t) = 1 | X = x, R(t) = 1)} P(E(t) = 1 | X = x, R(t) = 1)} \\
 &= \frac{P(D(t) = 1 | E(t) = 1, X = x, R(t) = 1)}{P(D(t) = 1 | E(t) = 0, X = x, R(t) = 1)} \\
 &= RH(t | X = x),
 \end{aligned}$$

where the fourth equality makes use of Bayes' rule. The coefficient  $\beta_0$  in this logistic regression model 2 thus has exactly the same interpretation as the coefficient  $\alpha_0$  in the Cox model 1: It gives the log relative hazard of death comparing vaccinated patients with  $X = 0$  to nonvaccinated patients with  $X = 0$ . Likewise,  $\beta_1$  in the logistic regression model (model 2) has the same interpretation as  $\alpha_1$  in the Cox regression (model 1): It gives the log of the ratio of this relative hazard at  $X = x + 1$  to the same relative hazard at  $X = x$ .

### **Part 3 – Illustration with Simulated Data in SAS**

The SAS program included below (SAS Institute Inc., Cary, North Carolina) illustrates the equivalence of case-centered logistic regression with Cox regression. We simulate a cohort of  $N$  people who risk death at  $T$  time points. We specify the proportion of the cohort that is randomly vaccinated, and we specify a relative risk by which vaccination multiplies the risk of death at each time point.

We fit 3 models and show that they yield identical estimates of the relative risk:

Model 1: Cox regression fitted to a typical cohort data set with 1 record per person (using the approximate likelihood of Breslow (reference A2)).

Model 2: Case-centered logistic regression fitted to a data set with 1 record per death.

Model 3: Case-centered logistic regression fitted to a smaller data set with 1 record per risk-set.

These 3 models are fitted to 3 data sets named Cohort, Deaths, and Risksets, respectively.

The program can be copied and run as is, or modified to try alternative specifications. It produces a summary table of results like the one included below (Appendix Table).

### **References for Appendix**

- A1. Anderson PK, Gill RD. Cox's regression model for counting processes: large sample study. *Ann Stat.* 1982;10(4):1100–1120.
- A2. Breslow NE. Covariance analysis of censored survival data. *Biometrics.* 1974;30(1):89–99.

```

/* SAS PROGRAM. Set the parameters for the simulation in the line below.*/

%macro sim (N=10000, T=10, X=0.5, risk=0.05, relrisk=0.5);
*****;
* where      N = number of people                               ;
*           T = number of timepoints                           ;
*           X = proportion of people exposed (vaccinated before the 1st timepoint) ;
*           risk = risk of death in each riskset in the unexposed (unvaccinated) ;
*           relrisk = relative risk                             ;
*****;
data COHORT          (keep = time person death vax)
  expanded_RISKSETS (keep = riskset person death vax);
  N = &N; T = &T; prob_vax = &X; Risk=&risk; RelRisk=&relrisk;

  do person = 1 to N;
    death = 0;                                     *person starts alive;
    vax = ranbin(0,1,prob_vax);                     *person gets vaccinated or not;
    if vax = 0 then prob_dth = risk;                 *if unvaccinated: person gets baseline risk;
    if vax = 1 then prob_dth = risk * relrisk;      *if vaccinated: risk is multiplied by relrisk;

    do timepoint = 1 to T while (death=0);          *person gets into every riskset until death;
      death = ranbin(0,1,prob_dth);                 *person dies or not;
      riskset = timepoint;                          *a riskset is identified for each timepoint;
      output expanded_RISKSETS;                     *risksets are output here, and condensed below;
    end;
    time = timepoint - 1;                            *Set time for Cox regression back to the last timepoint;
    output COHORT;                                  *Cox regression model is fit to this COHORT dataset;
  end;

proc sort data=expanded_risksets; by riskset person;

/* make a dataset with one record per riskset, for case-centered analysis by model 3 */
data RISKSETS (keep=riskset vax_dths tot_dths odds logodds);
  set expanded_RISKSETS;
  by riskset;
  retain vax_dths tot_dths vax_n unvax_n 0;
  if first.riskset then do;
    vax_dths=0; tot_dths=0; vax_n=0; unvax_n=0;
  end;
  if death=1 then tot_dths + 1;
  if death=1 and vax=1 then vax_dths + 1;
  if vax = 1 then vax_n + 1;
  if vax = 0 then unvax_n + 1;

  if last.riskset and (vax_n>0) and (unvax_n>0) then do;
    odds = vax_n / unvax_n;
    logodds = log(odds);
    output RISKSETS;
  end;

/* make a dataset with one record per death, for case-centered analysis by model 2 */
Data DEATHS (keep = Case_exposed logodds);
  Set RISKSETS;
  Do death = 1 to tot_dths;
  If death <= vax_dths then case_exposed = 1;
  Else case_exposed = 0;
  output DEATHS; end;

```

```

/* Model 1: Cox regression */
ods output phreg.parameterestimates=parms1;
proc PHREG data=COHORT nosummary;
model time*death(0)= vax / ties=BRESLOW convergeparm=0.000001;
title 'Model 1: Cox regression on cohort dataset';
data parms1; set parms1; length model $40.;
model = 'Cox regression';
keep model estimate stderr;

/* Model 2: Case-centered logistic regression with 1 record per death */
ods output logistic.parameterestimates=parms2;
proc LOGISTIC descending data = DEATHS;
model case_exposed = / offset=logodds converge=0.000001;
title "Model 2: Case-centered logistic regression using the dataset with 1 record per death";
data parms2; set parms2; if _n_=1;
model = "Case-centered, 1 record per death";
keep model estimate stderr;

/* Model 3: Case-centered logistic regression with 1 record per riskset */
ods output logistic.parameterestimates=parms3;
proc LOGISTIC descending data= RISKSETS;
model vax_dths / tot_dths = / offset=logodds converge=0.000001;
title 'Model 3: Case-centered logistic regression using the dataset with 1 record per riskset';
data parms3; set parms3; if _n_=1;
model = 'Case-centered, 1 record per riskset';
keep model estimate stderr;

/* Merge results from the three models */
data results;
set parms1 parms2 parms3;
N = &N;T=&T;relrisk=&relrisk;risk=&risk;prob_vax=&X;
rr = exp(estimate);
spread = 1.96*stderr;
lower = exp(estimate - spread);
upper = exp(estimate + spread);
covered='No ';
if lower < relrisk < upper then covered='Yes';
*Yes, if the 95% CI covers the true relative risk;

/* Label and print results */
proc print data=results split='*';
id model; var N T prob_vax risk relrisk rr lower upper covered;
format N comma9. rr lower upper 7.4 risk prob_vax relrisk 5.2;
label model = 'Type of*Model'
prob_vax = 'Probability*of*vaccination'
risk = 'Risk of*death*at each*time point*in unvaxed'
relrisk = 'True*underlying*relative*risk'
rr = "Estimate* of *relative*risk"
T = 'Number of* time *points'
N = 'Number* of *people'
lower = "Lower limit*of*95% CI"
upper = "Upper limit*of*95% CI"
covered = "Is true*rel. risk*inside the*95% CI?";
title 'Table. Cox regression compared with two versions of case-centered logistic regression';
title2 'Summary of three models fit to the same simulated data'; run;
%mend sim;
%sim (N=10000, T=10, X=0.5, risk=0.05, relrisk=0.5);

```

**Appendix Table.** Summary of 3 models fitted to the same simulated data (Cox regression compared with 2 versions of case-centered logistic regression)

| Type of Model                       | Number of people | Number of time points | Probability of vaccination | Risk of Death at each time point in unvaxed | True underlying Relative Risk |
|-------------------------------------|------------------|-----------------------|----------------------------|---------------------------------------------|-------------------------------|
| Cox regression                      | 10,000           | 10                    | 0.50                       | 0.05                                        | 0.50                          |
| Case-centered, 1 record per death   | 10,000           | 10                    | 0.50                       | 0.05                                        | 0.50                          |
| Case-centered, 1 record per riskset | 10,000           | 10                    | 0.50                       | 0.05                                        | 0.50                          |

| Type of Model                       | Estimate of relative risk | Lower limit of 95% Conf Int | Upper limit of 95% Conf Int | Is the true RR inside the 95% CI? |
|-------------------------------------|---------------------------|-----------------------------|-----------------------------|-----------------------------------|
| Cox regression                      | 0.4825                    | 0.4483                      | 0.5194                      | Yes                               |
| Case-centered, 1 record per death   | 0.4825                    | 0.4483                      | 0.5194                      | Yes                               |
| Case-centered, 1 record per riskset | 0.4825                    | 0.4483                      | 0.5194                      | Yes                               |
